# Supplementary material
Source: HighWire-hosted journal article supplement (https://cmaj.ca/highwire/filestream/58644/field_highwire_adjunct_files/0/salon-milloy-1-at.pdf)
Supplement: salon-milloy-1-at.pdf [file salon-milloy-1-at.pdf]

## Appendix 1: References for “Ending Canada’s HIV trials”

### References

1. Mykhalovskiy E. The problem of “significant risk”: exploring the public health impact of criminalizing HIV non-disclosure. *Soc Sci Med* 2011;73:668-75.
2. Burris S, Cameron E. The case against criminalization of HIV transmission. *JAMA* 2008;300:578-81.
3. Vernazza P, Hirschel B, Bernasconi E, et al. Les personnes seropositives ne souffrant d’aucune autre MST et suivant un traitement antiretroviral efficace ne transmettent pas le VIH par voie sexuelle. *Bulletin Medicale Suisse* 2008;89:165-9.
4. Montaner JS. Treatment as prevention — a double hat-trick. *Lancet* 2011;378:208-9.
